# Supplementary material for: The association between detection of Mycobacterium avium subsp. paratuberculosis DNA in feces and histopathological classification
Source: PubMed Central journal article supplement — J Vet Med Sci. 2020 Mar 11;82(5):541–5. doi: 10.1292/jvms.18-0724 (PMC7273589; doi:10.1292/jvms.18-0724), 2020-03-11
Supplement: jvms-82-541-s001.pdf [file jvms-82-541-s001.pdf]

Supplementary Table. The results of individual cattle. Value of ELISA was measured by using commercial ELISA kit (ELISA Paratuberculosis; Insitutit Pourquier, Montpellier, France). Samples are considered positive if value of ELISA was over 60. Ileocal area and mesenteric lymph node were histopathologically classified, however; ileocal area was better suited to multinomial logistic regression model analysis. The histopathological classification was not correlated with value of ELISA.

| Cattle No. | Breed             | Age in month | Value of ELISA | Fecal MAP DNA (pg/well) | Clinical sign | Histopathological classification |                       |
|------------|-------------------|--------------|----------------|-------------------------|---------------|----------------------------------|-----------------------|
|            |                   |              |                |                         |               | Ileocecal area                   | Mesenteric lymph node |
| 1          | Holstein Friesian | 55           | 188.967        | 3.81E-02                |               | T/L                              | T/L                   |
| 2          | Holstein Friesian | 47           | 232.545        | 8.34E+00                |               | T/L                              | L                     |
| 3          | Holstein Friesian | 31           | 211.864        | 3.27E-03                |               | T/L                              | T/L                   |
| 4          | Japanese Black    | 80           | 0.907          | 1.68E-02                |               | T                                | T/L                   |
| 5          | Japanese Black    | 118          | 0.716          | 1.23E-03                |               | T                                | T                     |
| 6          | Japanese Black    | 83           | 0.924          | 4.64E+00                |               | L                                | L                     |
| 7          | Japanese Black    | 97           | 1.081          | 3.65E-04                |               | T                                | T                     |
| 8          | Japanese Black    | 123          | 0.829          | 4.82E-03                |               | T                                | T                     |
| 9          | Japanese Black    | 121          | 0.843          | 5.02E-02                |               | T                                | N                     |
| 10         | Japanese Black    | 86           | 0.491          | 7.06E-04                |               | N                                | T                     |
| 11         | Japanese Black    | 109          | 0.430          | 3.06E-01                |               | T                                | N                     |
| 12         | Holstein Friesian | 114          | 1.023          | 1.97E+01                | diarrhea      | L                                | L                     |
| 13         | Holstein Friesian | 83           | 191.369        | 2.30E-01                |               | T/L                              | T/L                   |
| 14         | Holstein Friesian | 73           | 190.577        | 2.12E-03                |               | T                                | T                     |
| 15         | Holstein Friesian | 73           | 154.928        | 3.16E-02                |               | T                                | T                     |
| 16         | Holstein Friesian | 73           | 200.583        | 4.15E-03                |               | T/L                              | T                     |
| 17         | Holstein Friesian | 71           | 105.229        | 4.02E-03                |               | T                                | T                     |
| 18         | Holstein Friesian | 71           | 171.368        | 4.45E-02                |               | T                                | T                     |
| 19         | Holstein Friesian | 70           | 155.606        | 6.86E-03                |               | T                                | T/L                   |
| 20         | Holstein Friesian | 66           | 182.693        | 2.63E-02                |               | T/L                              | T/L                   |
| 21         | Holstein Friesian | 63           | 241.500        | 7.68E-01                |               | T/L                              | T/L                   |
| 22         | Holstein Friesian | 59           | 115.038        | 5.55E-04                |               | T                                | T                     |
| 23         | Holstein Friesian | 48           | 179.271        | 1.05E-01                |               | T/L                              | T                     |
| 24         | Holstein Friesian | 36           | 215.892        | 7.74E-03                |               | T/L                              | T                     |
| 25         | Holstein Friesian | 34           | 118.112        | 7.74E-03                |               | T                                | T                     |

| Cattle No. | Breed             | Age in month | Value of ELISA | Fecal MAP DNA (pg/well) | Clinical sign | Histopathological classification |                       |
|------------|-------------------|--------------|----------------|-------------------------|---------------|----------------------------------|-----------------------|
|            |                   |              |                |                         |               | Ileocecal area                   | Mesenteric lymph node |
| 26         | Holstein Friesian | 34           | 131.760        | 1.05E-01                |               | T/L                              | T/L                   |
| 27         | Holstein Friesian | 54           | 120.477        | 3.77E-03                |               | T                                | T                     |
| 28         | Holstein Friesian | 112          | 233.661        | 1.64E-03                |               | T/L                              | T                     |
| 29         | Holstein Friesian | 67           | 214.038        | 1.96E+00                |               | T/L                              | T                     |
| 30         | Holstein Friesian | 41           | 118.943        | 2.45E-03                |               | T                                | T                     |
| 31         | Holstein Friesian | 85           | 233.380        | 5.67E-01                |               | T                                | T/L                   |
| 32         | Holstein Friesian | 102          | 145.997        | 3.59E-01                |               | T                                | T                     |
| 33         | Holstein Friesian | 46           | 132.338        | 3.80E-01                |               | T/L                              | T/L                   |
| 34         | Japanese Black    | 57           | 0.913          | 1.06E-02                |               | T/L                              | T/L                   |
| 35         | Japanese Black    | 121          | 1.190          | 1.01E+01                |               | T/L                              | T/L                   |
| 36         | Holstein Friesian | 28           | 228.380        | 2.19E-02                |               | T                                | T                     |
| 37         | Japanese Black    | 71           | 0.574          | 4.83E-03                |               | T                                | T                     |
| 38         | Holstein Friesian | 67           | 196.226        | 1.30E-02                |               | T                                | T                     |
| 39         | Japanese Black    | 165          | NT             | 3.27E+00                |               | L                                | T/L                   |
| 40         | Holstein Friesian | 78           | 195.649        | 8.39E+01                |               | L                                | T/L                   |
| 41         | Holstein Friesian | 49           | 105.729        | 1.80E-03                |               | N                                | T                     |
| 42         | Japanese Black    | 70           | NT             | 5.63E+02                |               | L                                | L                     |
| 43         | Japanese Black    | 120          | 0.687          | 2.75E-02                |               | T                                | T                     |
| 44         | Japanese Black    | 98           | 135.043        | 5.15E-03                |               | N                                | N                     |
| 45         | Japanese Black    | 85           | 190.815        | 9.97E+00                |               | T/L                              | N                     |
| 46         | Japanese Black    | 83           | 154.158        | 1.12E-03                |               | N                                | N                     |
| 47         | Japanese Black    | 83           | 65.269         | 2.49E-03                |               | N                                | N                     |
| 48         | Japanese Black    | 121          | 142.993        | 3.63E-02                |               | T                                | T                     |
| 49         | Japanese Black    | 124          | 173.696        | 9.51E-02                |               | T                                | T/L                   |
| 50         | Japanese Black    | 101          | 179.819        | 6.43E-01                |               | T                                | T                     |

| Cattle No. | Breed             | Age in month | Value of ELISA | Fecal MAP DNA (pg/well) | Clinical sign | Histopathological classification |                       |
|------------|-------------------|--------------|----------------|-------------------------|---------------|----------------------------------|-----------------------|
|            |                   |              |                |                         |               | Ileocecal area                   | Mesenteric lymph node |
| 51         | Japanese Black    | 97           | 113.670        | 1.67E-03                |               | N                                | N                     |
| 52         | Japanese Black    | 199          | 91.143         | 9.09E-02                |               | N                                | N                     |
| 53         | Japanese Black    | 188          | 220.185        | 1.00E-02                |               | N                                | N                     |
| 54         | Japanese Black    | 119          | 176.649        | 2.32E+02                |               | L                                | L                     |
| 55         | Holstein Friesian | 55           | 125.966        | 1.52E-02                |               | N                                | N                     |
| 56         | Holstein Friesian | 123          | 144.752        | 5.06E-02                |               | T                                | T                     |
| 57         | Holstein Friesian | 93           | 154.272        | 1.42E-03                |               | N                                | N                     |
| 58         | Holstein Friesian | 39           | 214.435        | 5.42E-01                |               | T/L                              | T/L                   |
| 59         | Holstein Friesian | 92           | 67.598         | 3.90E-03                |               | T/L                              | T                     |
| 60         | Holstein Friesian | 89           | 133.365        | 1.56E+00                |               | T/L                              | T                     |
| 61         | Holstein Friesian | 89           | 149.730        | 2.88E+00                |               | T/L                              | L                     |
| 62         | Holstein Friesian | 53           | 155.214        | 1.40E-03                |               | N                                | N                     |
| 63         | Holstein Friesian | 55           | 210.140        | 3.83E-01                |               | T/L                              | L                     |
| 64         | Holstein Friesian | 38           | 175.892        | 1.99E+03                |               | L                                | L                     |
| 65         | Holstein Friesian | 53           | 203.772        | 5.05E+00                |               | L                                | L                     |
| 66         | Holstein Friesian | 93           | 102.314        | 3.50E-03                |               | T                                | T                     |
| 67         | Holstein Friesian | 33           | 257.213        | 1.89E+00                |               | T/L                              | T/L                   |
| 68         | Holstein Friesian | 41           | 201.451        | 2.05E-01                |               | T/L                              | T/L                   |
| 69         | Holstein Friesian | 75           | 64.297         | 3.25E-02                |               | N                                | T                     |
| 70         | Holstein Friesian | 102          | 221.266        | 3.37E+01                |               | L                                | L                     |
| 71         | Holstein Friesian | 41           | 112.942        | 1.20E-03                |               | T                                | T                     |
| 72         | Japanese Black    | 90           | 0.999          | 2.85E+00                |               | T/L                              | T/L                   |
| 73         | Holstein Friesian | 58           | 113.915        | 1.66E-02                |               | T                                | T                     |
| 74         | Holstein Friesian | 64           | 190.254        | 4.00E+00                | diarrhea      | T/L                              | T/L                   |
| 75         | Japanese Black    | 149          | 0.795          | 2.90E-01                |               | T/L                              | T/L                   |

| Cattle No. | Breed             | Age in month | Value of ELISA | Fecal MAP DNA (pg/well) | Clinical sign | Histopathological classification |                       |
|------------|-------------------|--------------|----------------|-------------------------|---------------|----------------------------------|-----------------------|
|            |                   |              |                |                         |               | Ileocecal area                   | Mesenteric lymph node |
| 76         | Holstein Friesian | 54           | 249.194        | 1.15E+01                |               | T/L                              | T/L                   |
| 77         | Japanese Black    | 114          | 0.501          | 1.40E-02                |               | N                                | T                     |
| 78         | Holstein Friesian | 52           | 122.452        | 3.56E-02                |               | T                                | T                     |
| 79         | Holstein Friesian | 109          | 125.130        | 5.90E-03                |               | N                                | N                     |
| 80         | Holstein Friesian | 105          | 160.484        | 5.70E-02                |               | T                                | N                     |
| 81         | Japanese Black    | 189          | 175.000        | 3.80E-02                |               | N                                | N                     |
| 82         | Japanese Black    | 121          | 88.377         | 3.50E-02                |               | N                                | N                     |
| 83         | Holstein Friesian | 35           | 164.623        | 2.00E-02                |               | T                                | T                     |
| 84         | Holstein Friesian | 76           | 70.864         | 2.40E-02                |               | N                                | T                     |
| 85         | Holstein Friesian | 57           | 251.274        | 5.60E-01                |               | T/L                              | T                     |
| 86         | Holstein Friesian | 113          | 182.116        | 1.90E-02                |               | N                                | N                     |
| 87         | Holstein Friesian | 74           | 68.194         | 2.20E-02                |               | T                                | N                     |
| 88         | Japanese Black    | 101          | 0.987          | 9.50E-03                |               | N                                | N                     |
| 89         | Japanese Black    | 113          | 0.493          | 1.10E-02                |               | N                                | N                     |
| 90         | Holstein Friesian | 72           | 170.920        | 2.71E+01                |               | L                                | L                     |
| 91         | Holstein Friesian | 34           | 144.458        | 8.22E+01                |               | T/L                              | L                     |
| 92         | Holstein Friesian | 39           | 221.689        | 3.08E+00                |               | T/L                              | T/L                   |
| 93         | Holstein Friesian | 82           | 180.665        | 1.25E-01                |               | T/L                              | T/L                   |
| 94         | Holstein Friesian | 52           | 167.104        | 8.29E+00                |               | L                                | L                     |
| 95         | Holstein Friesian | 49           | 62.030         | 1.74E-03                |               | T                                | T/L                   |
| 96         | Holstein Friesian | 48           | 204.462        | 2.80E-02                |               | T/L                              | T/L                   |
| 97         | Holstein Friesian | 45           | 156.693        | 1.48E-03                |               | N                                | T                     |
| 98         | Holstein Friesian | 41           | 223.535        | 2.61E-01                |               | T/L                              | T                     |
| 99         | Holstein Friesian | 38           | 182.502        | 8.54E+02                |               | L                                | L                     |
| 100        | Japanese Black    | 116          | 116.286        | 1.24E-03                |               | N                                | N                     |

| Cattle No. | Breed             | Age in month | Value of ELISA | Fecal MAP DNA (pg/well) | Clinical sign | Histopathological classification |                       |
|------------|-------------------|--------------|----------------|-------------------------|---------------|----------------------------------|-----------------------|
|            |                   |              |                |                         |               | Ileocecal area                   | Mesenteric lymph node |
| 101        | Japanese Black    | 59           | 173.725        | 6.92E+01                |               | L                                | L                     |
| 102        | Holstein Friesian | 67           | NT             | 1.32E-03                |               | N                                | N                     |
| 103        | Holstein Friesian | 43           | NT             | 4.28E-01                |               | T                                | T/L                   |
| 104        | Holstein Friesian | 59           | NT             | 3.71E-02                |               | N                                | T                     |
| 105        | Holstein Friesian | 75           | 188.776        | 6.60E-02                |               | N                                | T                     |
| 106        | Holstein Friesian | 68           | 203.651        | 2.93E+00                |               | T/L                              | T/L                   |
| 107        | Holstein Friesian | 57           | 128.205        | 2.53E-03                |               | T                                | N                     |
| 108        | Holstein Friesian | 53           | 202.608        | 4.44E+00                |               | T/L                              | T/L                   |
| 109        | Holstein Friesian | 51           | 98.251         | 8.58E+01                |               | L                                | L                     |
| 110        | Holstein Friesian | 5            | NT             | 1.68E-03                |               | N                                | N                     |
| 111        | Holstein Friesian | 5            | NT             | 9.16E-03                |               | N                                | N                     |
| 112        | Holstein Friesian | 44           | 157.953        | 3.54E-02                |               | N                                | N                     |
| 113        | Holstein Friesian | 109          | 66.981         | 7.76E-03                |               | N                                | N                     |
| 114        | Holstein Friesian | 89           | 232.495        | 2.04E-02                |               | T                                | N                     |
| 115        | Holstein Friesian | 56           | 212.118        | 3.33E-01                |               | T/L                              | T/L                   |
| 116        | Holstein Friesian | 92           | 137.277        | 1.46E-01                |               | T/L                              | T                     |
| 117        | Holstein Friesian | 79           | 132.412        | 1.55E-01                |               | T/L                              | T/L                   |
| 118        | Holstein Friesian | 70           | 66.466         | 4.31E-03                |               | N                                | N                     |
| 119        | Holstein Friesian | 49           | 63.472         | 2.40E-03                |               | N                                | N                     |
| 120        | Holstein Friesian | 84           | 212.373        | 2.72E+00                |               | L                                | L                     |
| 121        | Holstein Friesian | 61           | 225.093        | 3.01E+00                |               | L                                | T/L                   |
| 122        | Japanese Black    | 182          | 1.024          | 8.04E-02                |               | N                                | N                     |
| 123        | Japanese Black    | 99           | 157.794        | 1.40E+01                |               | L                                | L                     |
| 124        | Japanese Black    | 60           | 196.819        | 3.43E+02                |               | L                                | L                     |
| 125        | Japanese Black    | 60           | 252.475        | 2.25E+01                |               | L                                | L                     |

| Cattle No. | Breed             | Age in month | Value of ELISA | Fecal MAP DNA (pg/well) | Clinical sign | Histopathological classification |                       |
|------------|-------------------|--------------|----------------|-------------------------|---------------|----------------------------------|-----------------------|
|            |                   |              |                |                         |               | Ileocecal area                   | Mesenteric lymph node |
| 126        | Japanese Black    | 133          | 114.631        | 2.54E+01                |               | L                                | T/L                   |
| 127        | Holstein Friesian | 27           | 164.630        | 3.61E-01                |               | T                                | T                     |
| 128        | Holstein Friesian | 65           | 243.133        | 1.22E+01                |               | T/L                              | T                     |
| 129        | Holstein Friesian | 49           | 93.951         | 1.01E-01                |               | N                                | N                     |
| 130        | Holstein Friesian | 61           | 236.651        | 2.89E-02                |               | N                                | N                     |
| 131        | Holstein Friesian | 54           | 172.783        | 3.26E-02                |               | T                                | N                     |
| 132        | Holstein Friesian | 49           | 154.433        | 6.74E-02                |               | N                                | N                     |
| 133        | Japanese Black    | 137          | 186.796        | 1.14E-03                |               | N                                | N                     |
| 134        | Japanese Black    | 136          | 203.998        | 4.86E+01                |               | L                                | L                     |
| 135        | Japanese Black    | 136          | 64.930         | 1.03E-03                |               | N                                | N                     |
| 136        | Japanese Black    | 128          | 130.709        | 1.57E-03                |               | N                                | N                     |
| 137        | Japanese Black    | 29           | 98.486         | 4.97E-03                |               | N                                | N                     |
| 138        | Japanese Black    | 75           | 199.484        | 2.74E-02                |               | N                                | N                     |
| 139        | Japanese Black    | 121          | 85.991         | 9.17E+02                |               | L                                | L                     |
| 140        | Holstein Friesian | 72           | NT             | 1.61E+01                | diarrhea      | L                                | L                     |
| 141        | Japanese Black    | 127          | 1.056          | 4.48E+01                |               | L                                | L                     |
| 142        | Japanese Black    | 136          | 1.150          | 2.54E+01                |               | T/L                              | T/L                   |
| 143        | Holstein Friesian | 76           | 122.184        | 2.30E-03                |               | N                                | N                     |
| 144        | Holstein Friesian | 74           | 89.205         | 1.30E-01                |               | T                                | T                     |
| 145        | Holstein Friesian | 70           | 216.797        | 2.79E+02                |               | L                                | L                     |
| 146        | Holstein Friesian | 32           | 69.466         | 1.22E-03                |               | N                                | N                     |
| 147        | Holstein Friesian | 80           | 225.734        | 5.68E-03                |               | T/L                              | NT                    |
| 148        | Holstein Friesian | 25           | 155.463        | 7.67E+00                |               | T/L                              | T/L                   |
| 149        | Japanese Black    | 9            | 125.149        | 6.03E-03                |               | T                                | N                     |
| 150        | Holstein Friesian | 78           | 243.058        | 1.27E-01                |               | T/L                              | T/L                   |
| 151        | Japanese Black    | 139          | 69.324         | 1.85E+02                |               | L                                | L                     |
| 152        | Japanese Black    | 45           | 105.435        | 4.22E-03                |               | T                                | N                     |
| 153        | Holstein Friesian | 69           | 138.243        | 1.61E-02                |               | T                                | T                     |
